# Supplementary material for: Subclones of Bone Marrow CD34+ Cells in Acute Myeloid Leukemia at Diagnosis Confer Responses of Patients to Induction Chemotherapy
Source: Research Square preprint supplement (doi:10.21203/rs.3.rs-1047797/v1), 2021-11-15
Supplement: Supplementary file 1 [file 14b877b64c1b6c75e1b6365e.xlsx]

## Sheet: Table 2
Characteristics	Overall Cohort (n=12)		P-Value
	Sensitive	Resistant
	n=6	n=6
Gender (male/female)	5/1	3/3	0.2727
Age: years, median (range)	52(41-64)	63(50-66)	0.039
Peripheral blast %, median (range)	80.5(6-95)	85(61-96)	0.1881
Bone marrow blast %, median (range)	69(30-89)	90.5(67-92)	0.0632
WBC count (109/L), median(range)	13.25 (1.81-43.45)	20.72 (10.42-382.48)	0.1007
Hemoglobin (g/L), median (range)	108.5(96-118)	76(71-92)	<0.0001
Platelet count (109/L), median (range)	40(10-207)	48(16-69)	0.3045
Cytogenetic risk category (n)
Favorable	5	2	0.1212
Intermediate	1	3	0.2727
Adverse	0	1	0.5
Molecular abnormality
FLT3-ITD mutation			0.2727
Positive	1	3
Negative	5	3
NPM1 mutation			0.2273
Positive	0	2
Negative	6	4
CEBPA mutation			0.2727
Positive	3	1
Negative	3	5
CD52+ cells in CD34+ population			0.0011
>10%	6	0
≤10%	0	6
CD74+DAP12+ cells in CD34+ population			0.0303
>30%	4	0
≤30%	2	6
